# Supplementary material
Source: MDPI journal article supplement (https://www.mdpi.com/2311-7524/7/10/350)
Supplement: s1 [file s1]

**Table S1.** Description of the evaluated Iranian pomegranate genotypes consisting of their name and identification code.

| NO. | Genotype Code* | Genotype Name          | NO. | Genotype Code | Genotype Name        | NO. | Genotype Code | Genotype Name        |
|-----|----------------|------------------------|-----|---------------|----------------------|-----|---------------|----------------------|
| 1   | 1-180          | Jazireh                | 75  | 5-111         | Sefid-Shahreza       | 149 | 10-174        | Poost-Nazok-Darjazin |
| 2   | 2-108          | Murdi                  | 76  | 5-140         | Sorkh-Malas-Shahreza | 150 | 10-177        | Ardestani-Darjazin   |
| 3   | 2-134          | Do-Mazeh               | 77  | 5-143         | Makhmal-Ghermez      | 151 | 10-178        | Shahvar-Sefid        |
| 4   | 2-137          | Sefid-Rabi             | 78  | 5-190         | Sorkh-Torsh-Shahreza | 152 | 10-179        | Ardestani-Lasjerd    |
| 5   | 2-184          | Sefid-Bakhtiari        | 79  | 5-193         | Torsh-Shahreza       | 153 | 10-187        | Mamuli-Lasjerd       |
| 6   | 2-195          | Khodroo                | 80  | 5-206         | Siah-Dastjerd        | 154 | 10-188        | Shahvar-Ghermez      |
| 7   | 3-156          | Mesri                  | 81  | 5-209         | Savehei-Dastjerd     | 155 | 11-205        | Sarjou               |
| 8   | 3-119          | Robab-Kazerun          | 82  | 5-220         | Najafabad            | 156 | 11-213        | Ghermez-Bazmani      |
| 9   | 3-183          | Sabz-kazerun           | 83  | 5-226         | Esfahani-Danehsiah   | 157 | 11-208        | Torsh-Vashik         |
| 10  | 3-204          | Farugh-Estahban        | 84  | 5-239         | Bazri-Dastjerd       | 158 | 11-221        | Malas-Vashik         |
| 11  | 3-212          | Sabz-Sarvestan         | 85  | 5-248         | Ardestani-Ghermez    | 159 | 11-223        | Bihasteh-Sangan      |
| 12  | 3-222          | Shabestan-Poost-Koloft | 86  | 5-249         | Geli-danehsfid-Naein | 160 | 11-224        | Yek-Kiluei           |
| 13  | 3-214          | Oud-Ghermez            | 87  | 5-262         | Abdandan             | 161 | 11-228        | Golabi-Haste-Riz     |
| 14  | 3-215          | Bihasteh-Jahrom        | 88  | 5-269         | Ghermez-Dastjerd     | 162 | 11-231        | Sib-Hoshak           |
| 15  | 3-217          | Bihasteh-Sarvestan     | 89  | 5-276         | Ghermez-Mamuli       | 163 | 11-236        | Meikhosh-Sangan      |
| 16  | 3-219          | Atabaki-Sarvestan      | 90  | 5-282         | Keivani              | 164 | 11-240        | Golabi-Haste-Dorosht |
| 17  | 3-229          | Sabz-Ghasrdasht        | 91  | 5-288         | Yek-Kashan           | 165 | 11-245        | Bazmani-Poost-Nazok  |
| 18  | 3-230          | Ghalatoon              | 92  | 5-285         | Shahvar-Torsh        | 166 | 11-246        | Porbar-Saravan       |

|    |       |                       |     |       |                      |     |        |                      |
|----|-------|-----------------------|-----|-------|----------------------|-----|--------|----------------------|
| 19 | 3-234 | Kadroo-Shahri         | 93  | 5-293 | Binam-Dastjerd       | 167 | 11-250 | Malas-Sarjoo         |
| 20 | 3-235 | Porbar-Estahban       | 94  | 5-322 | Naein                | 168 | 11-260 | Narak-Vahshi-Sistan  |
| 21 | 3-237 | Sefid-Seyedan         | 95  | 5-329 | Danehsiah-Dastjerd   | 169 | 11-261 | Mamuli-Zabol         |
| 22 | 3-238 | Berit-Ghermez         | 96  | 5-336 | Malas-Dastjerd       | 170 | 11-268 | Savehei-Ghermez      |
| 23 | 3-242 | Kolukhi-Sarvestan     | 97  | 5-345 | Homaabad             | 171 | 11-272 | Savehi-Sistan        |
| 24 | 3-244 | Sakeli-Seyedan        | 98  | 5-354 | Ardestani-Sefid      | 172 | 11-277 | Nahug                |
| 25 | 3-251 | Panje-Aroos-khafar    | 99  | 5-362 | Shahvar-Malas        | 173 | 11-274 | Savehei-Sefid        |
| 26 | 3-253 | Shoor                 | 100 | 5-256 | Shahvar-poostghermez | 174 | 11-284 | Golabi-Poost-Nazok   |
| 27 | 3-255 | Tashtoo-Estahban      | 101 | 6-225 | Sefid-Babak          | 175 | 11-298 | Maamuli-Baluch       |
| 28 | 3-258 | Gelo-kande-Neiriz     | 102 | 6-259 | Baft                 | 176 | 11-300 | Kuhak                |
| 29 | 3-263 | Shahvar-Sarvestan     | 103 | 6-227 | Meikhosh-Babak       | 177 | 11-303 | Torsh-Nukjub         |
| 30 | 3-266 | Bihaste-Ghsrdasht     | 104 | 6-264 | Ghermez-Babak        | 178 | 11-307 | Orumieh-Sarjou       |
| 31 | 3-267 | Golnar-Sarvestan      | 105 | 6-291 | Sarjanganl-Bam       | 179 | 11-308 | Nukjub               |
| 32 | 3-270 | Sheitooni-Seyedon     | 106 | 6-295 | Golabi-Bam           | 180 | 11-309 | Sefid-Bazmani        |
| 33 | 3-271 | Khafari-Jahrom        | 107 | 6-317 | Meikhosh-Kerman      | 181 | 11-311 | Malisak-Hoshak       |
| 34 | 3-273 | Por-pea-Seyedan       | 108 | 6-327 | Mers-Bam             | 182 | 11-318 | Poost-Ghermez-Bazman |
| 35 | 3-275 | Khafari-Ghermez       | 109 | 6-346 | Sarjanganl           | 183 | 11-325 | Malas-Nukjub         |
| 36 | 3-278 | Abdolrahimk hani      | 110 | 6-347 | Sabi-Bam             | 184 | 11-334 | Meikhosh-Ladiz       |
| 37 | 3-287 | Oud-Neiriz            | 111 | 6-355 | Ghermez-Bam          | 185 | 11-343 | Bihaste-Ladiz        |
| 38 | 3-281 | Bazri-Neiriz          | 112 | 7-112 | Izeh                 | 186 | 11-344 | Sefid-Bazmani        |
| 39 | 3-289 | Robbab-Malas          | 113 | 7-113 | Kaviri               | 187 | 11-350 | Khorasani-Sefid      |
| 40 | 3-290 | Shabestan-Poost-Nazok | 114 | 7-120 | Danehsiah-Ramhormoz  | 188 | 11-358 | Bazmani-Poost-Koloft |

|    |       |                      |     |       |                         |     |        |                    |
|----|-------|----------------------|-----|-------|-------------------------|-----|--------|--------------------|
| 41 | 3-292 | Sefid-Estahban       | 115 | 7-122 | Sinehpahn-Daneh-Ghermez | 189 | 11-363 | Sabz-Hoshak        |
| 42 | 3-297 | Robab-Torsh          | 116 | 7-127 | Bitalaf-Daneh-Sefid     | 190 | 11-368 | Vashik-Shirin      |
| 43 | 3-305 | Narak-Marvdasht      | 117 | 7-131 | Sefid-Dezful            | 191 | 12-129 | Golabi-Pishva      |
| 44 | 3-306 | Remeich-Estahban     | 118 | 7-135 | Zaj-Ramhormoz           | 192 | 12-132 | Siah-Daneh-Kan     |
| 45 | 3-301 | Poostghermesz-Neiriz | 119 | 7-154 | Sorkh-Daneh-Sefid       | 193 | 12-139 | Toughi-Varamin     |
| 46 | 3-302 | Kam-pea-Seyedan      | 120 | 7-161 | Marmar-Ramhormoz        | 194 | 12-145 | Narak-Kan          |
| 47 | 3-312 | Narak-Ghasrdasht     | 121 | 7-164 | Malas-Ramhormoz         | 195 | 12-148 | Sabz-Varamin       |
| 48 | 3-314 | Gelo-Boland-Estahban | 122 | 7-189 | Yusefi-Dezful           | 196 | 12-153 | Shirin-Kan         |
| 49 | 3-316 | Hastehriz-Seyedoon   | 123 | 8-116 | Sefid-Boyer             | 197 | 12-160 | Vahshi-Kan         |
| 50 | 3-319 | Khajei-Ghasrdasht    | 124 | 8-162 | Shirin-Boyer            | 198 | 12-169 | Ghahveh-Daneh-Kan  |
| 51 | 3-320 | Shahvar-Ghsrdasht    | 125 | 8-171 | Vahshi-Boyer            | 199 | 12-170 | Shahpar-Pishva     |
| 52 | 3-321 | Narak-Sarvestan      | 126 | 8-182 | Sabz-Boyer              | 200 | 12-173 | Malas-Pishva       |
| 53 | 3-323 | Robab-Malas          | 127 | 9-107 | Khooshenar-Baharestan   | 201 | 12-181 | Shahpar-Varamin    |
| 54 | 3-328 | Atabaki-Sefid        | 128 | 9-126 | Mandali-Gorgan          | 202 | 12-191 | Malas-Kan          |
| 55 | 3-330 | Robab-Sarvestan      | 129 | 9-128 | Lamsari                 | 203 | 13-265 | Bi-Nam             |
| 56 | 3-331 | Torsh-Sarvestan      | 130 | 9-138 | Sisangan                | 204 | 13-280 | Bi-Nam             |
| 57 | 3-332 | Bihaste-Neiriz       | 131 | 9-141 | Siahnar-Behshahr        | 205 | 13-286 | Bi-Nam             |
| 58 | 3-333 | Asali-Sarvestan      | 132 | 9-147 | Mohseni-Gorgan          | 206 | 14-109 | Ghermez-Harabarjan |
| 59 | 3-335 | Zard-poost-Koloft    | 133 | 9-155 | Shekarnaz               | 207 | 14-110 | Garch-Shahvar      |

|    |       |                   |     |        |                     |     |        |                         |
|----|-------|-------------------|-----|--------|---------------------|-----|--------|-------------------------|
| 60 | 3-337 | Robab-Sefid       | 134 | 9-158  | Kabdar-Behshahr     | 208 | 14-114 | Tough-Gardan            |
| 61 | 3-339 | Farugh-Neiriz     | 135 | 9-163  | Torsh-Behshahr      | 209 | 14-118 | Zagh                    |
| 62 | 3-340 | Vahshi-Estahban   | 136 | 9-165  | Babolsar            | 210 | 14-121 | Shirin-Shahvar          |
| 63 | 3-348 | Shahvar-Marvdasht | 137 | 9-166  | Ghermez-Gorgan      | 211 | 14-125 | Malas-Yazdi             |
| 64 | 3-357 | Berit-Sarvestan   | 138 | 9-175  | Savadkuh            | 212 | 14-130 | Shirin-Harati           |
| 65 | 3-352 | Khafari-Sefid     | 139 | 9-185  | Khoram-Deer-Gorgan  | 213 | 14-144 | Aban-Mahi               |
| 66 | 3-359 | Robab-Ghasrdasht  | 140 | 9-186  | Zir-Ab              | 214 | 14-151 | Zagh-Harabarjan         |
| 67 | 3-366 | Kadroo-Ghasrdasht | 141 | 9-194  | Shahi-Gorgan        | 215 | 14-233 | Abarnadabad             |
| 68 | 3-367 | Shahvar-Estahban  | 142 | 9-196  | Shirin-Behshahr     | 216 | 14-247 | Marvast                 |
| 69 | 3-369 | Kalaghi           | 143 | 10-115 | Sag-Nar-Lasjerd     | 217 | 14-296 | Poost-sefid-Abarnadabad |
| 70 | 3-376 | Atabaki-Ghermez   | 144 | 10-117 | Shahvar-Lasjerd     | 218 | 14-338 | Ghermez-Harati          |
| 71 | 4-136 | Lushan            | 145 | 10-124 | Porbar-Darjazin     | 219 | 14-342 | Mehr-Mahi               |
| 72 | 4-168 | Ramsar            | 146 | 10-133 | Gharancho k-Lasjerd | 220 | 14-361 | Khormaei                |
| 73 | 4-210 | Jangali-Rudbar    | 147 | 10-149 | Abdandan-Lasjerd    | 221 | 14-370 | Zagh-Marvast            |
| 74 | 4-353 | Kuhi-Rudbar       | 148 | 10-152 | Narak-Lasjerd       |     |        |                         |

\*The identification code include location: (1) Bushehr, (2) Chaharmahal and Bakhtiari, (3) Fars, (4) Gilan, (5) Isfahan, (6) Kerman , (7) Khuzestan , (8) Kohgiluyeh and Boyer-Ahmad, (9) Mazandaran, (10) Semnan, (11) Sistan and Baluchestan (12) Tehran , (13) Unknown, (14) Yazd, number of genotype in collection.

**Table S2.** Description of the various phenotypic traits and their frequency in the entire and core collection of the evaluated 221 pomegranate genotypes.

| Descriptor                          | Abbreviation | Scores | phenotype                  | Entire Count | Frequency (%) | Core Count | Frequency (%) |
|-------------------------------------|--------------|--------|----------------------------|--------------|---------------|------------|---------------|
| Tree: Tree Crown Shape              | TCS          | 1      | Perfectly upright          | 0            | 0             | 0          | 0             |
|                                     |              | 2      | Upright                    | 34           | 15.38         | 4          | 33.33         |
|                                     |              | 3      | Wide                       | 187          | 84.61         | 8          | 66.66         |
|                                     |              | 4      | Downward                   | 0            | 0             | 0          | 0             |
|                                     |              | 5      | Quite downward             | 0            | 0             | 0          | 0             |
| Tree: Tree Growth Power             | TGP          | 1      | Weak                       | 29           | 13.12         | 1          | 8.33          |
|                                     |              | 2      | Medium                     | 68           | 30.76         | 3          | 25            |
|                                     |              | 3      | Strong                     | 124          | 56.10         | 8          | 66.66         |
| Tree: Thorn in Mature wood Branch   | TMB          | 1      | Very few                   | 160          | 72.39         | 8          | 66.66         |
|                                     |              | 3      | Few                        | 40           | 18.09         | 1          | 8.33          |
|                                     |              | 5      | Medium                     | 13           | 5.88          | 1          | 8.33          |
|                                     |              | 7      | A lot                      | 8            | 3.61          | 2          | 16.66         |
|                                     |              | 9      | Too many                   | 0            | 0             | 0          | 0             |
| Leaf: Length-to-Width Leaf Ratio    | LWLR         | 1      | Very few                   | 0            | 0             | 0          | 0             |
|                                     |              | 3      | Few                        | 0            | 0             | 0          | 0             |
|                                     |              | 5      | Medium                     | 117          | 52.94         | 7          | 58.33         |
|                                     |              | 7      | A lot                      | 104          | 47.05         | 5          | 41.66         |
|                                     |              | 9      | Too many                   | 0            | 0             | 0          | 0             |
| flower: Flower Position             | FP           | 1      | Lateral                    | 128          | 57.91         | 5          | 41.66         |
|                                     |              | 3      | End                        | 68           | 30.76         | 4          | 33.33         |
|                                     |              | 5      | Lateral and end            | 25           | 11.31         | 3          | 25            |
| flower: Flower Formation Site       | FFS          | 1      | More on a yearly branch    | 147          | 66.51         | 8          | 66.66         |
|                                     |              | 2      | More on perennial branches | 74           | 33.48         | 4          | 33.33         |
| flower: Dominant Flowering Habit    | DFH          | 1      | Regular                    | 115          | 52.03         | 6          | 50            |
|                                     |              | 2      | Irregular                  | 106          | 47.96         | 6          | 50            |
| flower: Fruitful Flowers Percentage | FFP          | 1      | Less than 50%              | 129          | 58.37         | 5          | 41.66         |
|                                     |              | 2      | More than 50%              | 92           | 41.62         | 7          | 58.33         |
| flower: Flower Cup Diameter         | FCD          | 3      | Small                      | 18           | 8.14          | 3          | 25            |
|                                     |              | 5      | Medium                     | 186          | 84.16         | 6          | 50            |
|                                     |              | 7      | Large                      | 17           | 7.69          | 3          | 25            |

|                                          |      |   |                 |     |       |    |       |
|------------------------------------------|------|---|-----------------|-----|-------|----|-------|
| Fruit: Fruit Size                        | FS   | 1 | Very small      | 0   | 0     | 0  | 0     |
|                                          |      | 3 | Small           | 6   | 2.71  | 2  | 16.66 |
|                                          |      | 5 | Medium          | 209 | 94.57 | 8  | 66.66 |
|                                          |      | 7 | Big             | 4   | 1.80  | 1  | 8.33  |
|                                          |      | 9 | Very big        | 2   | 0.9   | 1  | 8.33  |
| Fruit: Fruit Skin Thickness              | FST  | 1 | Thin            | 15  | 6.78  | 1  | 8.33  |
|                                          |      | 3 | Medium          | 193 | 87.33 | 9  | 75    |
|                                          |      | 5 | Thick           | 12  | 5.42  | 1  | 8.33  |
|                                          |      | 7 | Very thick      | 1   | 0.45  | 1  | 8.33  |
| Fruit: Fruit Skin Sensitivity to Burst   | FSSB | 1 | Very low        | 0   | 0     | 0  | 0     |
|                                          |      | 3 | Low             | 25  | 11.31 | 2  | 16.66 |
|                                          |      | 5 | Medium          | 22  | 9.95  | 1  | 8.33  |
|                                          |      | 7 | High            | 174 | 78.73 | 9  | 75    |
|                                          |      | 9 | Very high       | 0   | 0     | 0  | 0     |
| Fruit: Fruit Skin Sensitivity to Sunburn | FSSS | 1 | Very low        | 0   | 0     | 0  | 0     |
|                                          |      | 3 | Low             | 8   | 3.61  | 1  | 8.33  |
|                                          |      | 5 | Medium          | 213 | 96.38 | 11 | 91.66 |
|                                          |      | 7 | High            | 0   | 0     | 0  | 0     |
|                                          |      | 9 | Very high       | 0   | 0     | 0  | 0     |
| Fruit: Fruit Flavor                      | FF   | 1 | Sour            | 52  | 23.53 | 5  | 41.66 |
|                                          |      | 2 | Sour-Sweet      | 147 | 66.51 | 5  | 41.66 |
|                                          |      | 3 | Sweet           | 22  | 9.95  | 2  | 16.66 |
| Fruit: Fruit Ripening Time               | FRT  | 3 | Soon            | 2   | 0.9   | 1  | 8.33  |
|                                          |      | 5 | Moderate        | 207 | 93.66 | 10 | 83.33 |
|                                          |      | 7 | Late            | 12  | 5.42  | 1  | 8.33  |
| Fruit: Fruit Skin Color                  | FSC  | 1 | White to Yellow | 0   | 0     | 0  | 0     |
|                                          |      | 2 | Yellow          | 0   | 0     | 0  | 0     |
|                                          |      | 3 | Yellow-red      | 113 | 51.13 | 6  | 50    |
|                                          |      | 4 | Light red       | 0   | 0     | 0  | 0     |
|                                          |      | 5 | Red             | 85  | 38.46 | 4  | 33.33 |
|                                          |      | 6 | Dark red        | 23  | 10.4  | 2  | 16.66 |
|                                          |      | 7 | Red-black       | 0   | 0     | 0  | 0     |
| Fruit: Fruit Shape                       | FSH  | 1 | Spherical       | 94  | 42.53 | 5  | 41.66 |
|                                          |      | 2 | Oval            | 104 | 47.05 | 5  | 41.66 |
|                                          |      | 3 | Ovoid           | 23  | 10.40 | 2  | 16.66 |
|                                          |      | 4 | Broad           | 0   | 0     | 0  | 0     |
| Fruit: Fruit Crown Shape                 | FCS  | 1 | Long neck       | 107 | 48.41 | 6  | 50    |
|                                          |      | 2 | Normal          | 114 | 51.58 | 6  | 50    |
|                                          |      | 3 | Short neck      | 0   | 0     | 0  | 0     |

|                                 |     |   |                        |     |       |    |       |
|---------------------------------|-----|---|------------------------|-----|-------|----|-------|
|                                 |     | 4 | Without neck           | 0   | 0     | 0  | 0     |
|                                 |     | 1 | Hexagonal symmetry,    | 0   | 0     | 0  | 0     |
|                                 |     | 2 | Pentagonal symmetry    | 44  | 19.90 | 2  | 16.66 |
| Fruit: Fruit Symmetry           | FSY | 3 | Asymmetric No bold     | 42  | 19    | 3  | 25    |
|                                 |     | 4 | and symmetrical        | 122 | 55.20 | 5  | 41.66 |
|                                 |     | 5 | Smooth and symmetrical | 13  | 5.88  | 2  | 16.66 |
| Aril: Aril Size                 | AS  | 1 | Small                  | 10  | 4.52  | 2  | 16.66 |
|                                 |     | 3 | Medium                 | 211 | 95.47 | 10 | 83.33 |
|                                 |     | 5 | Large                  | 0   | 0     | 0  | 0     |
| Aril: Aril Color                | AC  | 1 | White                  | 2   | 0.9   | 1  | 8.33  |
|                                 |     | 2 | Pink                   | 3   | 1.35  | 1  | 8.33  |
|                                 |     | 3 | Light red              | 213 | 96.38 | 9  | 75    |
|                                 |     | 4 | Dark red               | 3   | 1.35  | 1  | 8.33  |
| Seed: Seed Hardness             | SH  | 1 | Very soft              | 2   | 0.9   | 1  | 8.33  |
|                                 |     | 3 | Soft                   | 0   | 0     | 0  | 0     |
|                                 |     | 5 | Hard                   | 219 | 99.09 | 11 | 91.66 |
|                                 |     | 7 | Very hard              | 0   | 0     | 0  | 0     |
| Yield: Number of Fruits in Tree | NFT | 1 | 0-9                    | 3   | 1.35  | 1  | 8.33  |
|                                 |     | 3 | 10-19                  | 43  | 19.45 | 1  | 8.33  |
|                                 |     | 5 | 20-29                  | 9   | 4.07  | 2  | 16.66 |
|                                 |     | 7 | 30-39                  | 145 | 65.61 | 4  | 33.33 |
|                                 |     | 9 | 40-49                  | 21  | 9.5   | 4  | 33.33 |
| Yield: Fruit Mean Weight        | FMW | 1 | 0-99                   | 16  | 7.23  | 1  | 8.33  |
|                                 |     | 3 | 100-199                | 177 | 80.09 | 7  | 58.33 |
|                                 |     | 5 | 200-299                | 23  | 10.40 | 2  | 16.66 |
|                                 |     | 7 | 300-399                | 4   | 1.80  | 1  | 8.33  |
|                                 |     | 9 | 400-499                | 1   | 0.45  | 1  | 8.33  |
| Yield: Tree Mean Yield          | TMY | 1 | Low                    | 78  | 35.29 | 6  | 50    |
|                                 |     | 3 | Medium                 | 95  | 42.98 | 4  | 33.33 |
|                                 |     | 5 | High                   | 48  | 21.71 | 2  | 16.66 |
